# Supplementary material for: Topographic connectivity reveals task-dependent retinotopic processing throughout the human brain
Source: PubMed Central journal article supplement (PMC7812773; doi:10.1073/pnas.2017032118), 2020-12-28
Supplement: pnas.2017032118.sapp.pdf [file pnas.2017032118.sapp.pdf]

1

## 2 **Supplementary Information for**

### 3 **Topographic connectivity reveals task-dependent retinotopic processing throughout the** 4 **human brain**

5 **Tomas Knapen**

6 **Tomas Knapen**

7 **E-mail: [tknapen@gmail.com](mailto:tknapen@gmail.com)**

#### 8 **This PDF file includes:**

9 Figs. S1 to S5 (not allowed for Brief Reports)

10 Tables S1 to S4 (not allowed for Brief Reports)

11 SI References

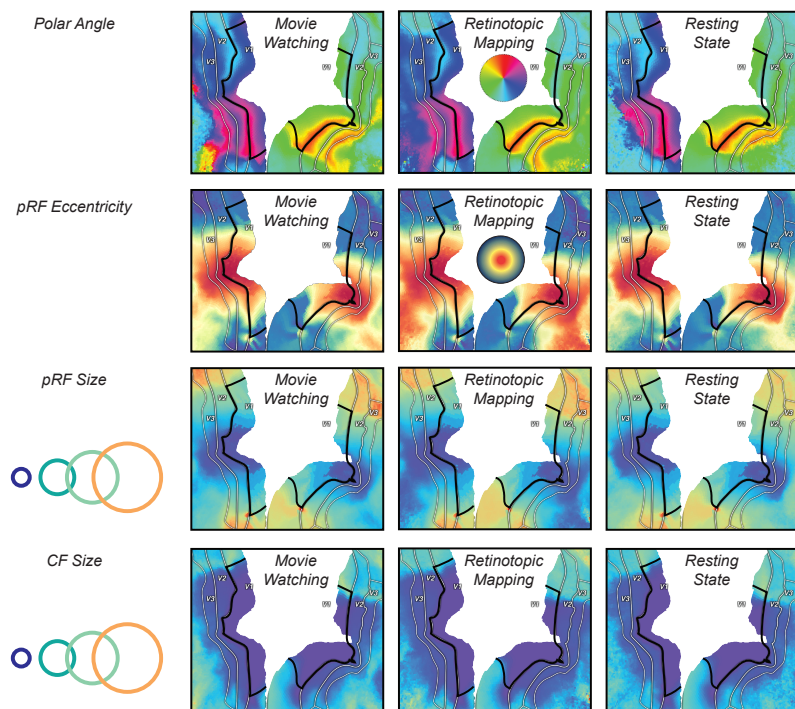

**Fig. S1.** Detailed visualization of retinotopic parameters resulting from CF fit in the visual system. View identical to that of Fig 1 e,f&g.

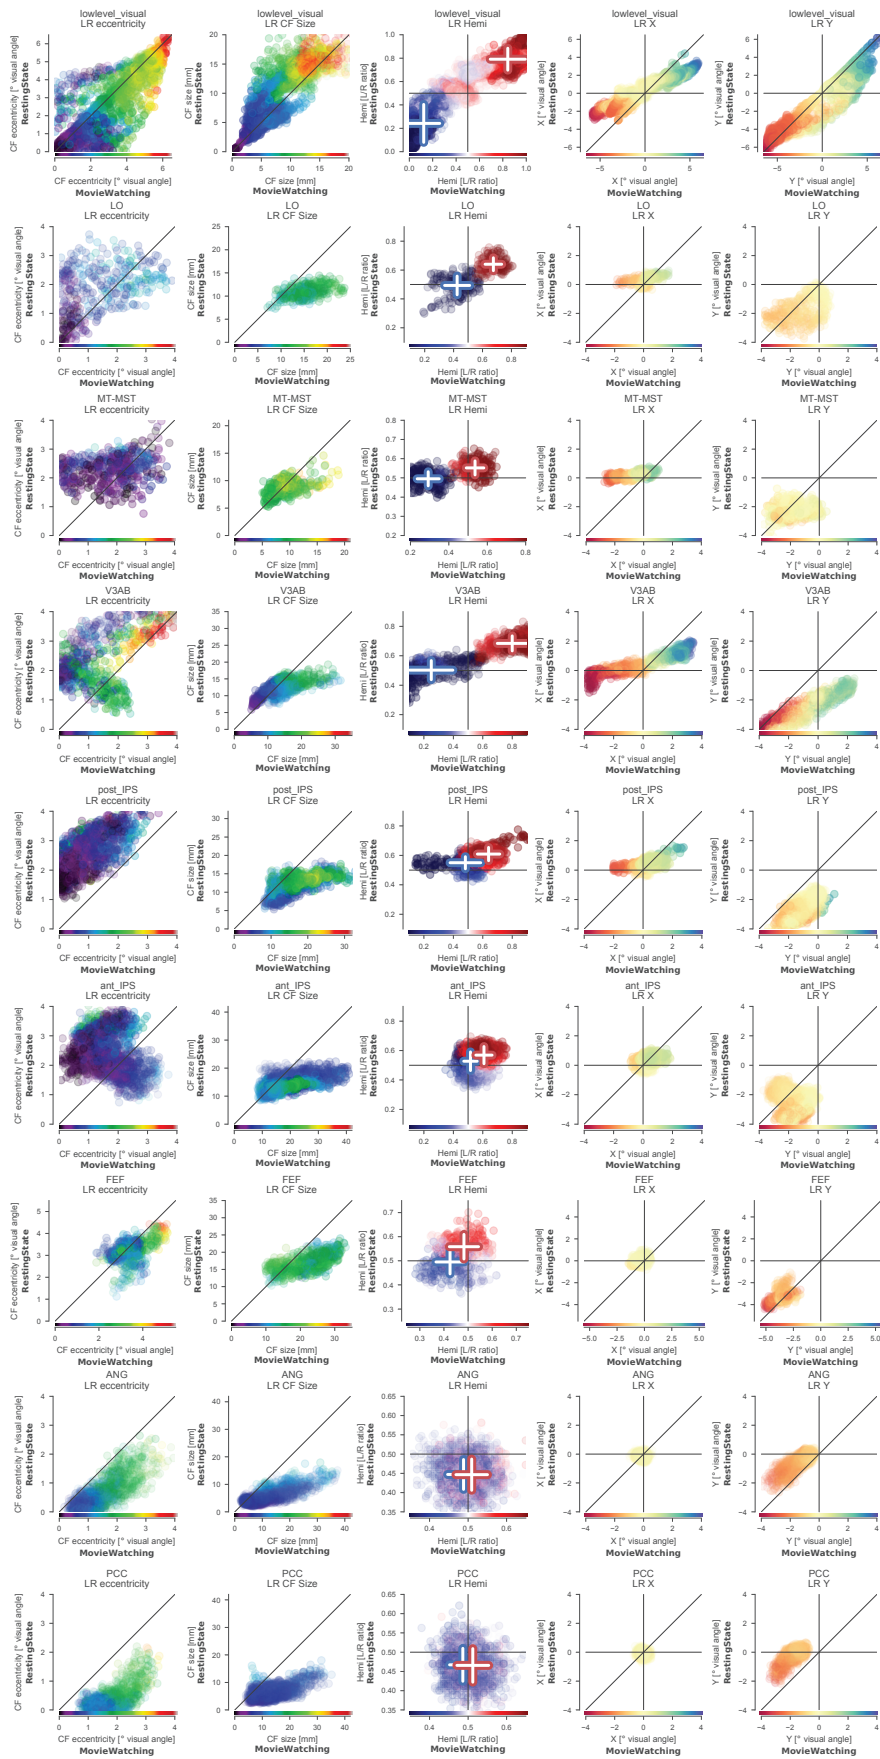

**Fig. S2.** CF parameter correlations between conditions for several visual regions in the dorsal visual processing stream, from lower to higher levels of processing. All ROI **Tomaskraper** from the MMP-HCP atlas (1). "lowlevel\_visual" combines V2 and V3. This figure adds columns for x and y CF-pRF parameters. **3 of 11**

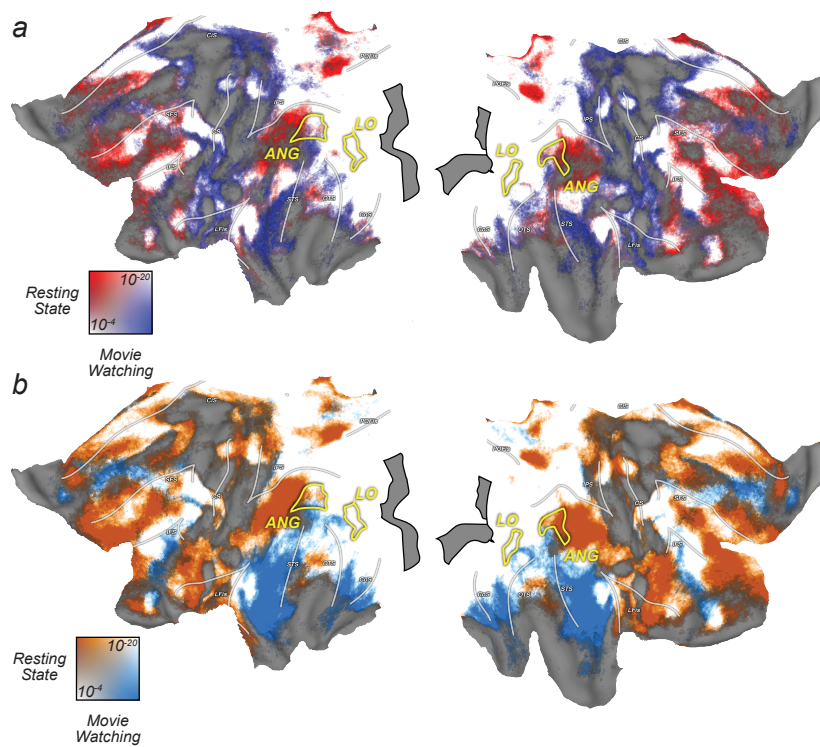

**Fig. S3.** CF fits are stable across experiments. **a.** It is possible to fit the CF model on one experiment, and then predict the BOLD timecourses of a second experiment. Colours represent negative  $\log_{10}$  p-values for training on Resting State and testing on Movie Watching (Blue) and vice-versa (Red). In most regions (White) prediction across experiments is highly significant in both directions. Reference against the same visualization of within-experiment prediction (**b.**) reveals that the preference of a given location depends on the experiment on which it was tested. This indicates that 1. CF estimates are stable across conditions, and 2. differences in RC between experiments are driven by the strength at which RC is driven in the test, and not the train condition. CF visual field preferences are not distributed evenly across the visual field; in the horizontal direction, they tend to prefer the center of the visual field whereas in the vertical direction more CFs cover the lower meridian of visual space.

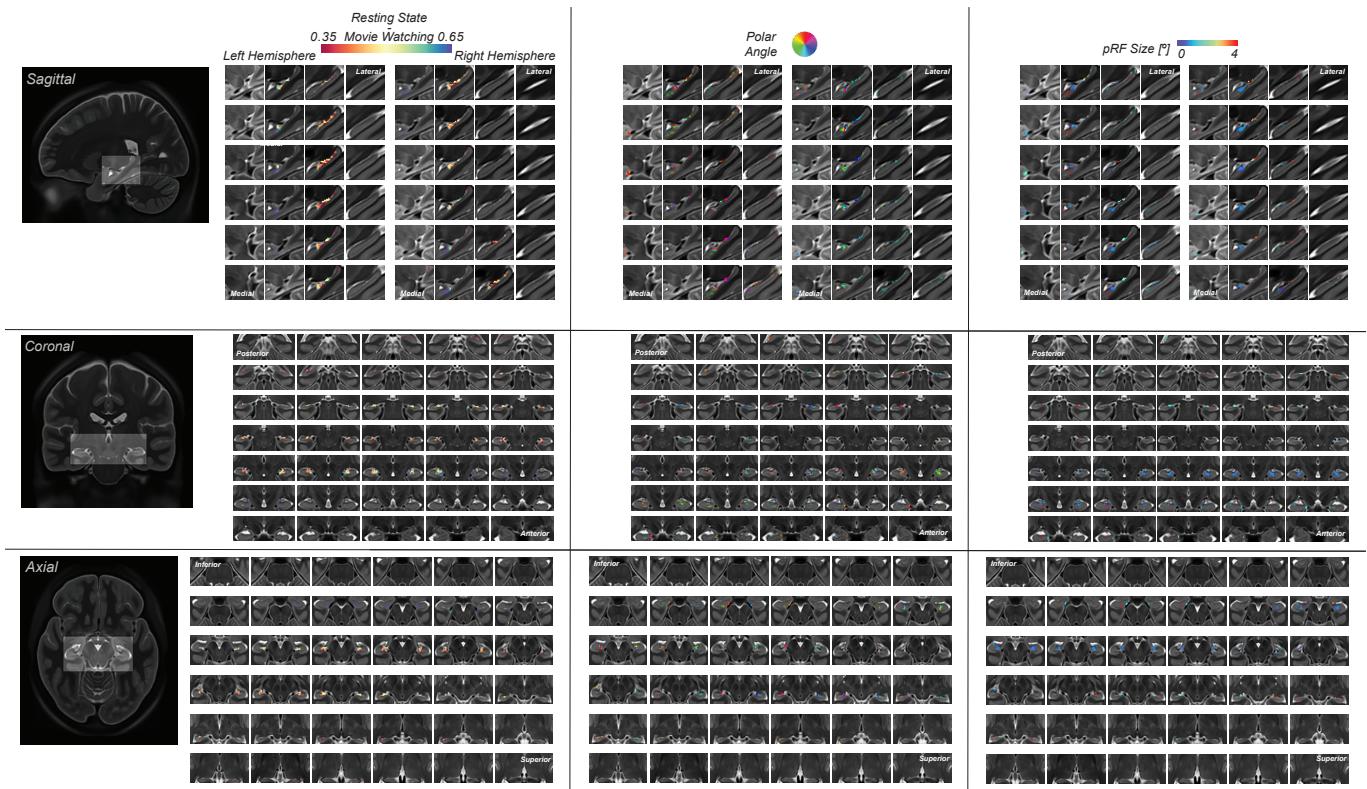

**Fig. S4.** Full zoomed lightbox views of relative strength of hippocampal retinotopic connectivity in Resting State and Movie Watching (left), pRF polar angle (middle) and pRF size (right), were derived from the retinotopic mapping experiment, analyzed identically to V1 (See Fig 1 & methods).

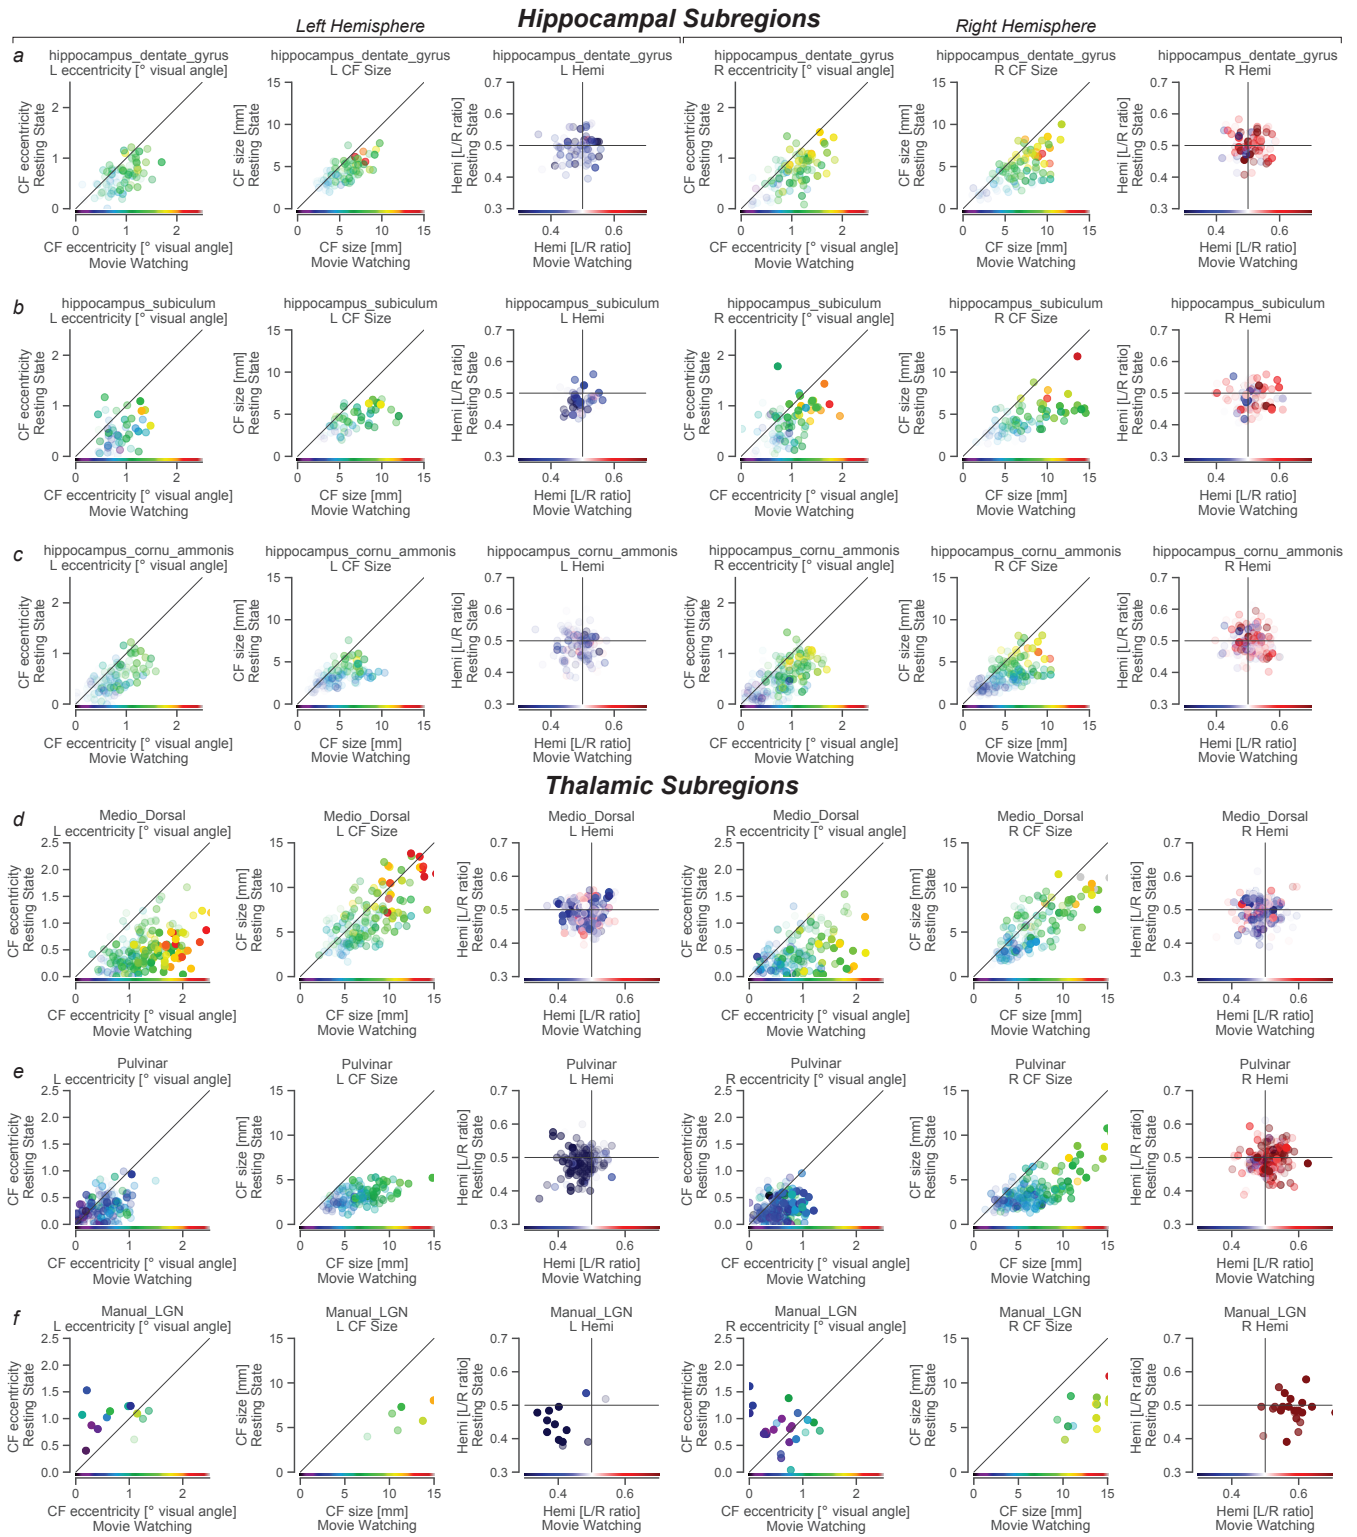

**Fig. S5.** CF parameters in selected subfields of subcortical (Hippocampus and Thalamus) structures, per hemisphere. ROIs taken from Jülich histological (2) and Najdenovska (3) atlases of hippocampus and thalamus, respectively, with LGN delineated manually.

**Table S1. Statistics for CF parameter correlations in cerebral cortex. MW; Movie Watching, RS; Resting State, RM; Retinotopic Mapping. rho; linear correlation coefficient, wcorr; linear correlation coefficient weighted by r-squared.**

| FEF                    | V2      | V3     | MT-MST | V3AB   | LO     | post-IPS | ant-IPS | ANG     | PCC     |
|------------------------|---------|--------|--------|--------|--------|----------|---------|---------|---------|
| ecc MW vs RS rho       | 0.4498  | 0.9156 | 0.2554 | 0.8029 | 0.4470 | 0.7278   | -0.1970 | 0.7923  | 0.6557  |
| ecc MW vs RM rho       | 0.6607  | 0.9581 | 0.1751 | 0.7557 | 0.6926 | 0.4524   | 0.2978  | 0.6354  | 0.5317  |
| ecc RS vs RM rho       | 0.4201  | 0.9089 | 0.3350 | 0.5206 | 0.6130 | 0.4794   | 0.2829  | 0.4754  | 0.5374  |
| ecc MW vs RS p         | 0.0000  | 0.0000 | 0.0000 | 0.0000 | 0.0000 | 0.0000   | 0.0000  | 0.0000  | 0.0000  |
| ecc MW vs RM p         | 0.0000  | 0.0000 | 0.0001 | 0.0000 | 0.0000 | 0.0000   | 0.0000  | 0.0000  | 0.0000  |
| ecc RS vs RM p         | 0.0000  | 0.0000 | 0.0000 | 0.0000 | 0.0000 | 0.0000   | 0.0000  | 0.0000  | 0.0000  |
| ecc wcorr MW vs RS     | 0.4600  | 0.9162 | 0.2170 | 0.7773 | 0.4820 | 0.7351   | -0.1543 | 0.7989  | 0.6385  |
| ecc wcorr RS vs RM     | 0.3934  | 0.9169 | 0.3304 | 0.4953 | 0.6332 | 0.4287   | 0.2667  | 0.5796  | 0.5652  |
| ecc wcorr MW vs RM     | 0.6515  | 0.9586 | 0.1910 | 0.7420 | 0.7006 | 0.3955   | 0.3720  | 0.7078  | 0.5352  |
| CF size MW vs RS rho   | 0.6325  | 0.8889 | 0.5090 | 0.6101 | 0.4847 | 0.6393   | 0.6523  | 0.8240  | 0.6180  |
| CF size MW vs RM rho   | -0.3419 | 0.9063 | 0.3849 | 0.7053 | 0.5863 | 0.3109   | -0.3228 | 0.6763  | 0.2201  |
| CF size RS vs RM rho   | -0.1833 | 0.8884 | 0.4098 | 0.6481 | 0.3669 | 0.5121   | -0.3641 | 0.7873  | 0.4611  |
| CF size MW vs RS p     | 0.0000  | 0.0000 | 0.0000 | 0.0000 | 0.0000 | 0.0000   | 0.0000  | 0.0000  | 0.0000  |
| CF size MW vs RM p     | 0.0000  | 0.0000 | 0.0000 | 0.0000 | 0.0000 | 0.0000   | 0.0000  | 0.0000  | 0.0000  |
| CF size RS vs RM p     | 0.0000  | 0.0000 | 0.0000 | 0.0000 | 0.0000 | 0.0000   | 0.0000  | 0.0000  | 0.0000  |
| CF size wcorr MW vs RS | 0.6434  | 0.8808 | 0.5219 | 0.6584 | 0.4910 | 0.6467   | 0.6118  | 0.7905  | 0.5681  |
| CF size wcorr RS vs RM | -0.1615 | 0.8858 | 0.4198 | 0.6673 | 0.3657 | 0.5113   | -0.3652 | 0.8045  | 0.6365  |
| CF size wcorr MW vs RM | -0.3085 | 0.9059 | 0.4147 | 0.7593 | 0.5898 | 0.3067   | -0.2810 | 0.6091  | 0.3873  |
| hemi MW vs RS rho      | 0.2557  | 0.9344 | 0.5372 | 0.8620 | 0.7286 | 0.4339   | 0.1413  | 0.1646  | 0.0018  |
| hemi MW vs RM rho      | 0.3319  | 0.9504 | 0.9421 | 0.8878 | 0.8676 | 0.6810   | 0.5593  | -0.0701 | 0.1709  |
| hemi RS vs RM rho      | 0.6062  | 0.9304 | 0.6051 | 0.8423 | 0.7807 | 0.5683   | 0.3709  | -0.1252 | 0.1179  |
| hemi MW vs RS p        | 0.0000  | 0.0000 | 0.0000 | 0.0000 | 0.0000 | 0.0000   | 0.0000  | 0.0005  | 0.9694  |
| hemi MW vs RM p        | 0.0000  | 0.0000 | 0.0000 | 0.0000 | 0.0000 | 0.0000   | 0.0000  | 0.1391  | 0.0003  |
| hemi RS vs RM p        | 0.0000  | 0.0000 | 0.0000 | 0.0000 | 0.0000 | 0.0000   | 0.0000  | 0.0081  | 0.0135  |
| hemi wcorr MW vs RS    | 0.2629  | 0.9506 | 0.5399 | 0.8723 | 0.7420 | 0.4976   | 0.2074  | -0.0430 | -0.1401 |
| hemi wcorr RS vs RM    | 0.6158  | 0.9482 | 0.6115 | 0.8466 | 0.7849 | 0.5945   | 0.3816  | 0.0090  | 0.0042  |
| hemi wcorr MW vs RM    | 0.3501  | 0.9671 | 0.9433 | 0.9027 | 0.8696 | 0.7046   | 0.5743  | 0.1360  | 0.1228  |
| pRF X MW vs RS rho     | 0.2879  | 0.9225 | 0.5654 | 0.9038 | 0.5205 | 0.4566   | 0.2194  | 0.0351  | -0.0206 |
| pRF X MW vs RM rho     | 0.4168  | 0.9335 | 0.9320 | 0.9561 | 0.8261 | 0.8110   | 0.6049  | 0.0632  | 0.1132  |
| pRF X RS vs RM rho     | 0.5405  | 0.8948 | 0.6085 | 0.9215 | 0.6590 | 0.5227   | 0.3368  | -0.1130 | 0.2073  |
| pRF X MW vs RS p       | 0.0000  | 0.0000 | 0.0000 | 0.0000 | 0.0000 | 0.0000   | 0.0000  | 0.4592  | 0.6667  |
| pRF X MW vs RM p       | 0.0000  | 0.0000 | 0.0000 | 0.0000 | 0.0000 | 0.0000   | 0.0000  | 0.1825  | 0.0177  |
| pRF X RS vs RM p       | 0.0000  | 0.0000 | 0.0000 | 0.0000 | 0.0000 | 0.0000   | 0.0000  | 0.0170  | 0.0000  |
| pRF X wcorr MW vs RS   | 0.2998  | 0.9368 | 0.5722 | 0.9123 | 0.5226 | 0.5185   | 0.2782  | -0.1261 | -0.1425 |
| pRF X wcorr RS vs RM   | 0.5593  | 0.9224 | 0.6124 | 0.9240 | 0.6598 | 0.5605   | 0.3437  | 0.0275  | 0.0892  |
| pRF X wcorr MW vs RM   | 0.4408  | 0.9530 | 0.9356 | 0.9636 | 0.8275 | 0.8379   | 0.6203  | 0.0973  | 0.0998  |
| pRF Y MW vs RS rho     | 0.4498  | 0.9554 | 0.2521 | 0.9503 | 0.4486 | 0.7359   | -0.1967 | 0.8075  | 0.7635  |
| pRF Y MW vs RM rho     | 0.6607  | 0.9764 | 0.2293 | 0.8950 | 0.7347 | 0.5250   | 0.3018  | 0.6354  | 0.5317  |
| pRF Y RS vs RM rho     | 0.4201  | 0.9386 | 0.0878 | 0.7824 | 0.6138 | 0.4251   | 0.2528  | 0.5059  | 0.6346  |
| pRF Y MW vs RS p       | 0.0000  | 0.0000 | 0.0000 | 0.0000 | 0.0000 | 0.0000   | 0.0000  | 0.0000  | 0.0000  |
| pRF Y MW vs RM p       | 0.0000  | 0.0000 | 0.0000 | 0.0000 | 0.0000 | 0.0000   | 0.0000  | 0.0000  | 0.0000  |
| pRF Y RS vs RM p       | 0.0000  | 0.0000 | 0.0540 | 0.0000 | 0.0000 | 0.0000   | 0.0000  | 0.0000  | 0.0000  |
| pRF Y wcorr MW vs RS   | 0.4600  | 0.9568 | 0.2130 | 0.9450 | 0.4779 | 0.7411   | -0.1541 | 0.8005  | 0.6925  |
| pRF Y wcorr RS vs RM   | 0.3934  | 0.9469 | 0.0591 | 0.7642 | 0.6337 | 0.3729   | 0.2398  | 0.5748  | 0.6270  |
| pRF Y wcorr MW vs RM   | 0.6515  | 0.9778 | 0.2835 | 0.8901 | 0.7377 | 0.5310   | 0.3741  | 0.7078  | 0.5352  |

**Table S2. Statistics for movie-watching RC in different hippocampal subfields**

| Movie watching     | T      | dof | p-val       | cohen-d | BF10      | power |
|--------------------|--------|-----|-------------|---------|-----------|-------|
| CA1                | 9.941  | 173 | 5.28584e-19 | 0.754   | 9.507e+15 | 1     |
| CA3                | 13.855 | 173 | 3.77237e-30 | 1.05    | 8.602e+26 | 1     |
| CA4                | 9.897  | 173 | 6.96224e-19 | 0.75    | 7.259e+15 | 1     |
| GC-DG              | 11.367 | 173 | 5.0978e-23  | 0.862   | 8.263e+19 | 1     |
| HATA               | 7.753  | 173 | 3.67912e-13 | 0.588   | 1.881e+10 | 1     |
| HP_tail            | 3.813  | 173 | 9.55131e-05 | 0.289   | 163.061   | 0.984 |
| molecular_layer_HP | 10.848 | 173 | 1.51676e-21 | 0.822   | 2.954e+18 | 1     |
| parasubiculum      | 10.813 | 173 | 1.90166e-21 | 0.82    | 2.366e+18 | 1     |
| presubiculum       | 11.985 | 173 | 8.74929e-25 | 0.909   | 4.489e+21 | 1     |
| subiculum          | -0.35  | 173 | 0.636802    | 0.027   | 0.18      | 0.023 |



**Table S3. Statistics for resting-state RC in different hippocampal subfields**

| Movie watching     | T      | dof | p-val       | cohen-d | BF10      | power |
|--------------------|--------|-----|-------------|---------|-----------|-------|
| CA1                | -0.574 | 173 | 0.716772    | 0.044   | 0.199     | 0.013 |
| CA3                | 4.016  | 173 | 4.40624e-05 | 0.304   | 335.108   | 0.991 |
| CA4                | 3.888  | 173 | 7.20393e-05 | 0.295   | 211.937   | 0.987 |
| GC-DG              | 5.275  | 173 | 1.96592e-07 | 0.4     | 55870     | 1     |
| HATA               | -0.344 | 173 | 0.63439     | 0.026   | 0.179     | 0.023 |
| HP_tail            | 9.485  | 173 | 9.55299e-18 | 0.719   | 5.593e+14 | 1     |
| molecular_layer_HP | 4.167  | 173 | 2.43291e-05 | 0.316   | 583.993   | 0.994 |
| parasubiculum      | 2.695  | 173 | 0.00387086  | 0.204   | 5.605     | 0.851 |
| presubiculum       | 9.74   | 173 | 1.89864e-18 | 0.738   | 2.718e+15 | 1     |
| subiculum          | 2.585  | 173 | 0.0052737   | 0.196   | 4.267     | 0.824 |

**Table S4. Statistics for the difference between resting-state and movie watching RC in different hippocampal subfields**

| Movie watching     | T      | dof | p-val       | cohen-d | BF10      | power |
|--------------------|--------|-----|-------------|---------|-----------|-------|
| CA1                | -5.87  | 346 | 1.02077e-08 | 0.629   | 970000    | 1     |
| CA3                | -3.748 | 346 | 0.000208772 | 0.402   | 91.057    | 0.962 |
| CA4                | -1.84  | 346 | 0.0666119   | 0.197   | 0.599     | 0.45  |
| GC-DG              | -1.889 | 346 | 0.0597003   | 0.203   | 0.654     | 0.47  |
| HATA               | -5.99  | 346 | 5.26794e-09 | 0.642   | 1.818e+06 | 1     |
| HP_tail            | 4.955  | 346 | 1.13427e-06 | 0.531   | 11380     | 0.999 |
| molecular_layer_HP | -1.933 | 346 | 0.0541079   | 0.207   | 0.707     | 0.487 |
| parasubiculum      | -5.153 | 346 | 4.31793e-07 | 0.552   | 28180     | 0.999 |
| presubiculum       | 0.695  | 346 | 0.487632    | 0.074   | 0.149     | 0.107 |
| subiculum          | 2.262  | 346 | 0.024307    | 0.243   | 1.366     | 0.616 |

12 **References**

- 13 1. MF Glasser, et al., A multi-modal parcellation of human cerebral cortex. *Nature* **536**, 171–178 (2016).  
14 2. SB Eickhoff, S Heim, K Zilles, K Amunts, Testing anatomically specified hypotheses in functional imaging using cytoarchi-  
15 tectonic maps. *NeuroImage* **32**, 570–582 (2006).  
16 3. E Najdenovska, et al., In-vivo probabilistic atlas of human thalamic nuclei based on diffusion- weighted magnetic resonance  
17 imaging. *Sci. Data* **5**, 180270 (2018).
